# Supplementary material
Source: Elsevier journal article supplement (https://www.sciencedirect.com/science/article/pii/S1138359321001441)
Supplement: mmc1 [file S1138359321001441:mmc1.doc]

Tabla suplementaria 1. Objetivo de control glucémico individualizado acorde a las recomendaciones de la redGDPS 2018

| Edad | Duración de DM2, presencia de complicaciones o comorbilidades* | HbA1c objetivo (%) |
| --- | --- | --- |
| ≤ 65 años | Sin complicaciones o comorbilidades graves | <7,0 |
| > 15 años de evolución o con complicaciones o comorbilidades graves | <8,0 |
| 66-75 años | ≤ 15 años de evolución sin complicaciones o comorbilidades graves | <7,0 |
| > 15 años de evolución sin complicaciones o comorbilidades graves | 7,0-8,0 |
| Con complicaciones o comorbilidades graves | <8,5 |
| > 75 años | | <8,5 |

*“Complicaciones o comorbilidades graves” a criterio del evaluador.
